# Supplementary material for: Simultaneous analysis of tocopherols, tocotrienols, phospholipids, γ-oryzanols and β-carotene in rice by ultra-high performance liquid chromatography coupled to a linear ion trap-orbitrap mass spectrometer
Source: Royal Society of Chemistry journal article supplement (doi:10.1039/c6ay00556j), 2016-01-01
Supplement: c6ay00556j1.pdf [file c6ay00556j1.pdf]

**ChemDraw files as follows:**

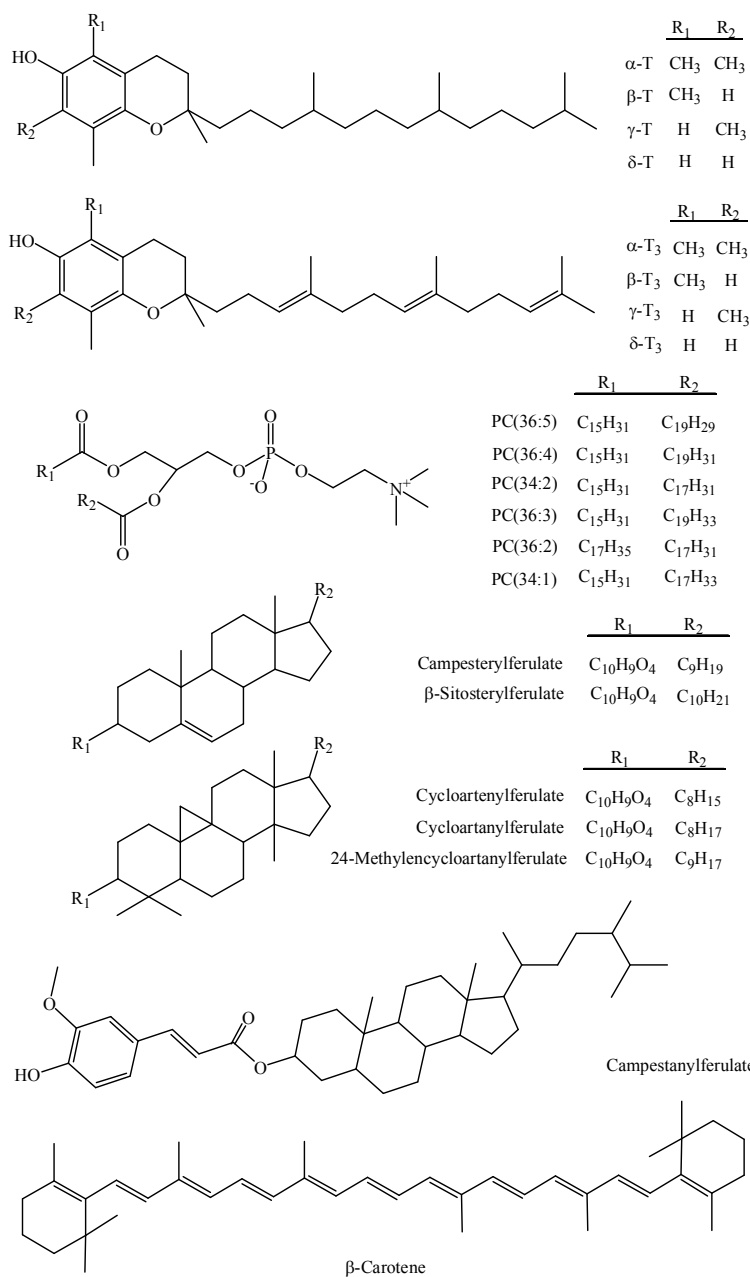

**21 nutritional compositions**

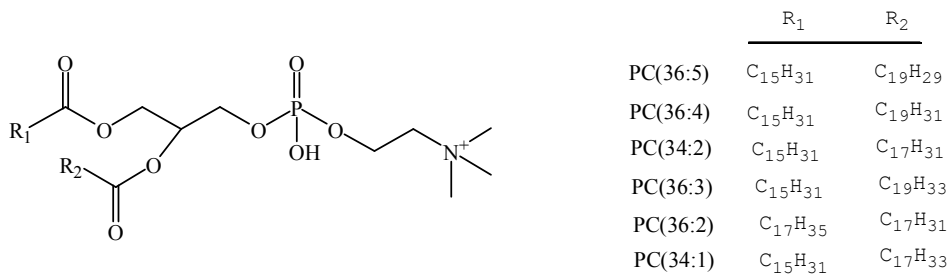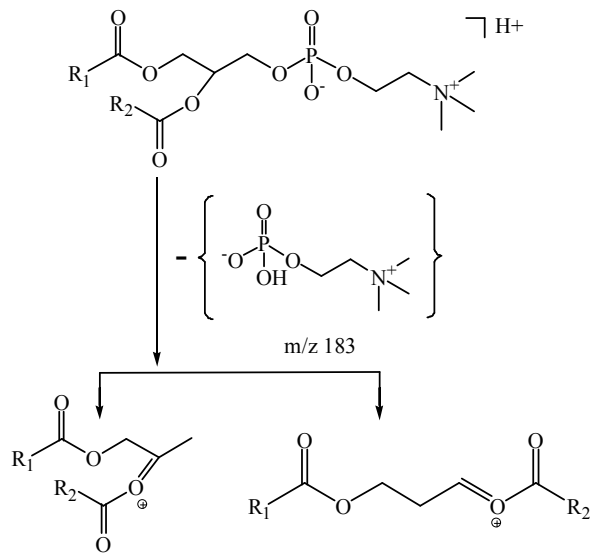

The fragmentation patterns of phospholipids

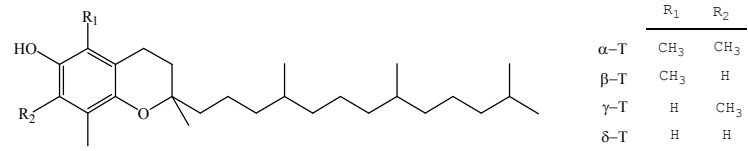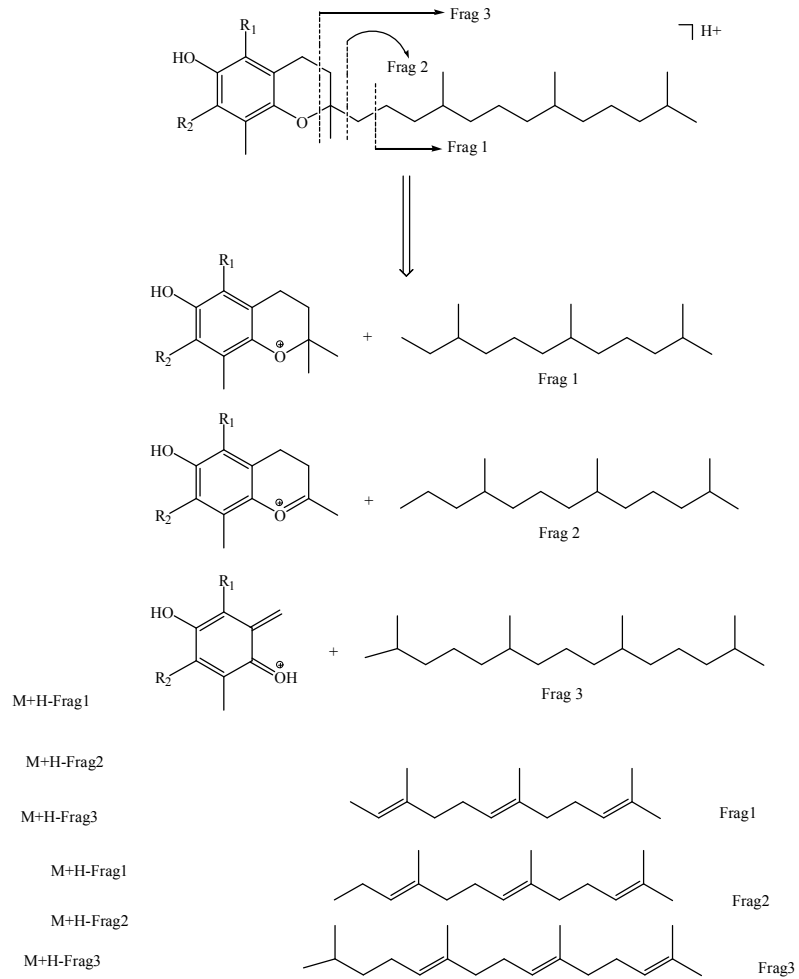

The fragmentation patterns of tocopherols

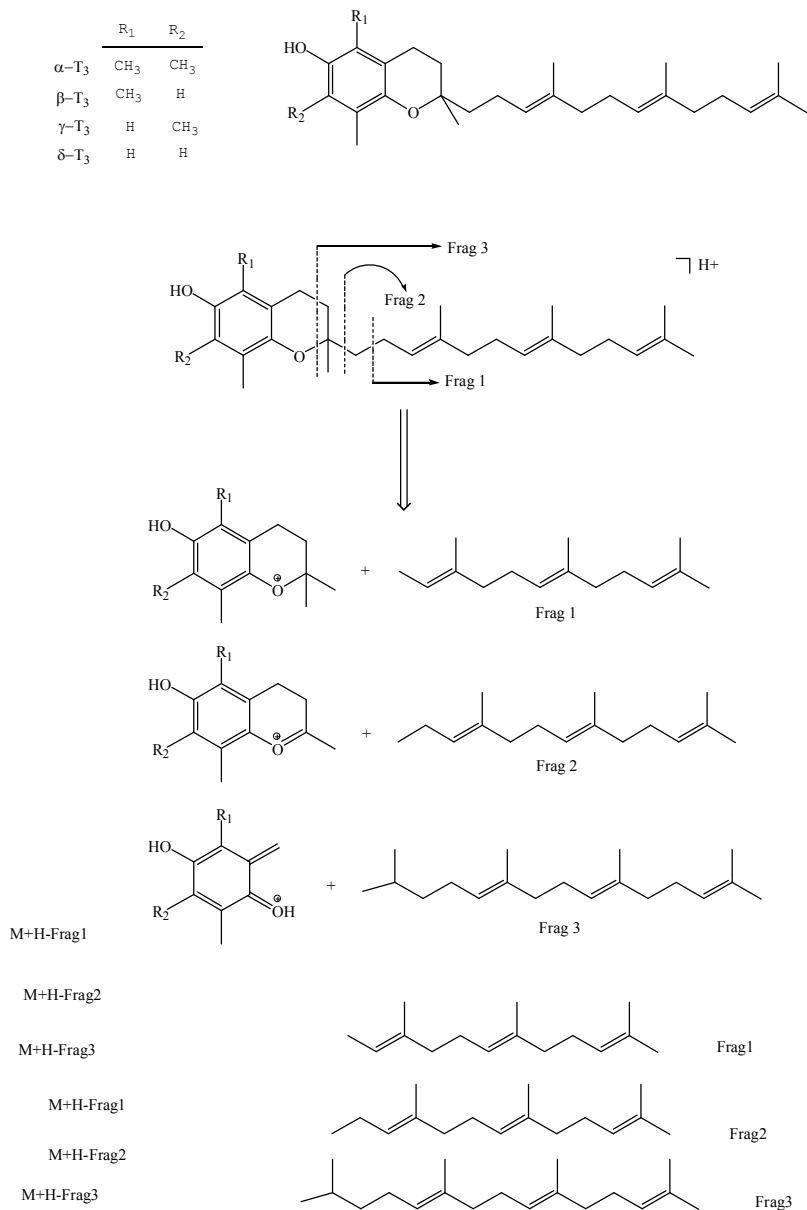

The fragmentation patterns of tocotrienols

$\beta$ -Carotene

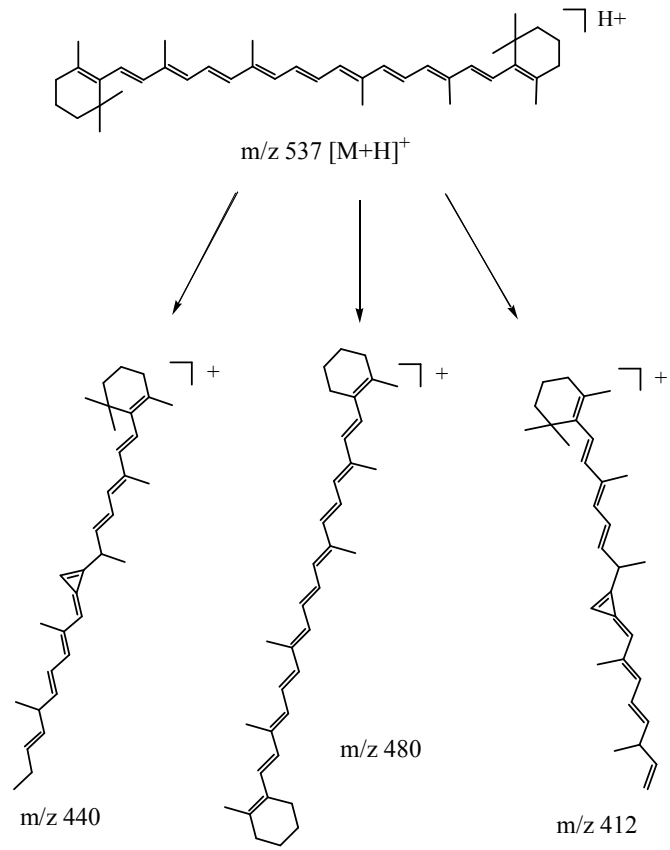

The fragmentation patterns of  $\beta$ -carotene

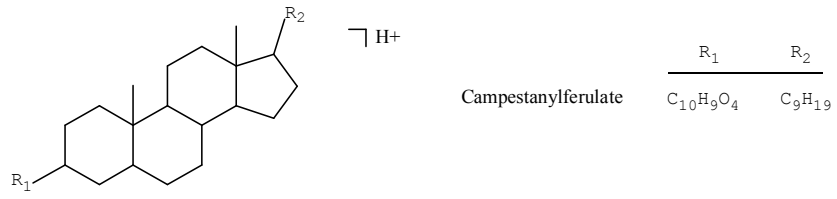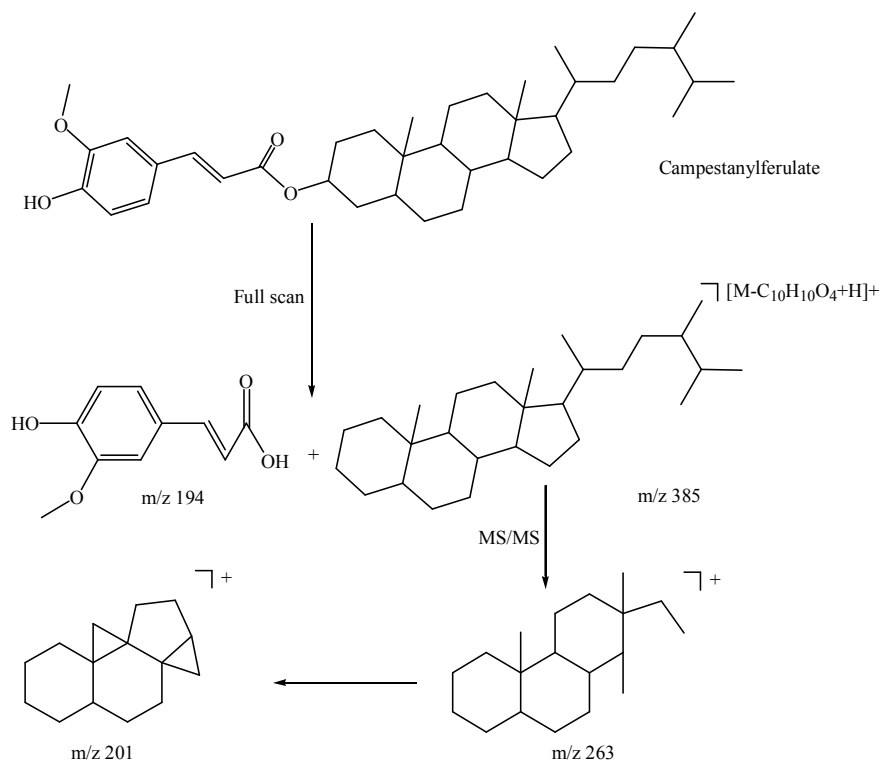

The fragmentation patterns of  $\gamma$ -oryzanol (1)

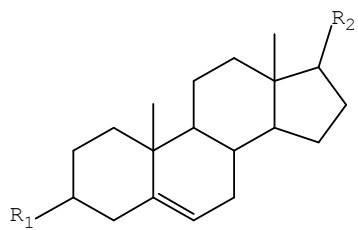

|                      | R <sub>1</sub>                                | R <sub>2</sub>                  |
|----------------------|-----------------------------------------------|---------------------------------|
| Campesterylferulate  | C <sub>10</sub> H <sub>9</sub> O <sub>4</sub> | C <sub>9</sub> H <sub>19</sub>  |
| β-Sitosterylferulate | C <sub>10</sub> H <sub>9</sub> O <sub>4</sub> | C <sub>10</sub> H <sub>21</sub> |

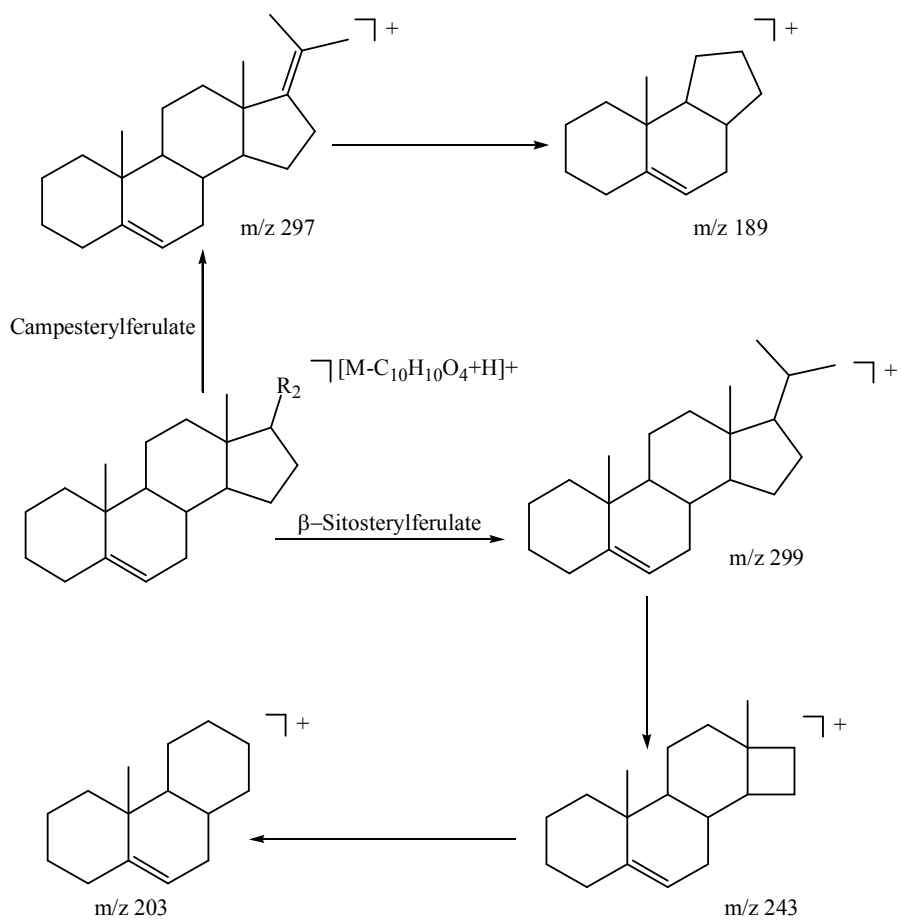

The fragmentation patterns of  $\gamma$ -oryzanols (2)

| R <sub>1</sub>                                | R <sub>2</sub>                 |
|-----------------------------------------------|--------------------------------|
| C <sub>10</sub> H <sub>9</sub> O <sub>4</sub> | C <sub>8</sub> H <sub>15</sub> |
| C <sub>10</sub> H <sub>9</sub> O <sub>4</sub> | C <sub>8</sub> H <sub>17</sub> |
| C <sub>10</sub> H <sub>9</sub> O <sub>4</sub> | C <sub>9</sub> H <sub>17</sub> |

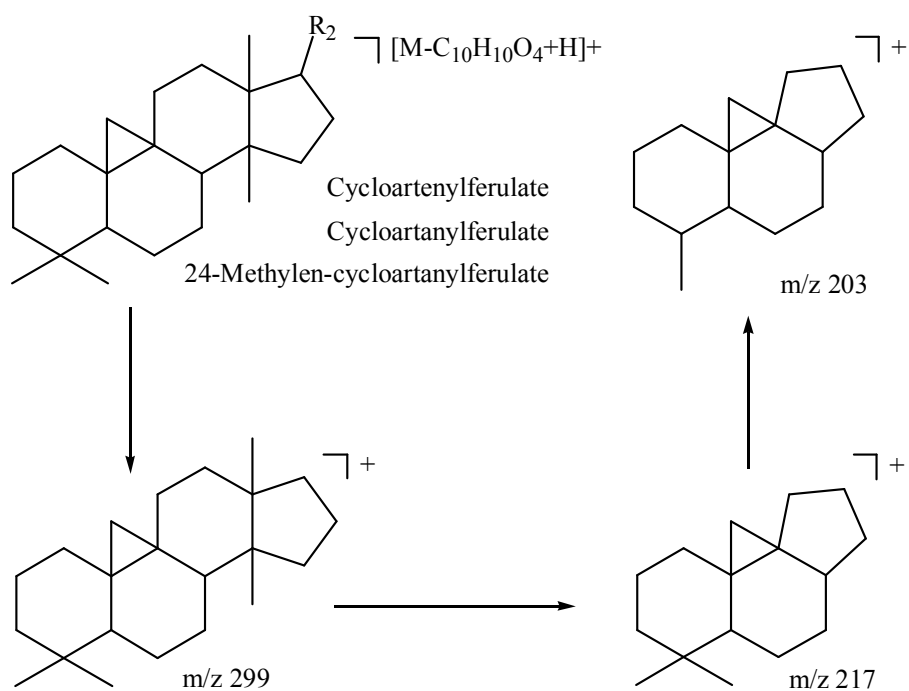

The fragmentation patterns of  $\gamma$ -oryzanols (3)



**The source files of ChemDraw as follows:**

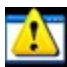

21 nutritional compositions.cdx

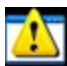

The fragmentation patterns of phospholipids.cdx

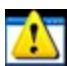

The fragmentation patterns of tocopherols.cdx

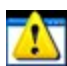

The fragmentation patterns of tocotrienols.cdx

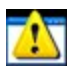

The fragmentation patterns of  $\beta$ -carotene.cdx



The fragmentation patterns of  $\gamma$ -oryzanol(1).cdx

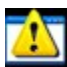

The fragmentation patterns of  $\gamma$ -oryzanols(2).cdx

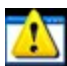

The fragmentation patterns of  $\gamma$ -oryzanols(3).cdx

Figures A.1-A.3 as follows:

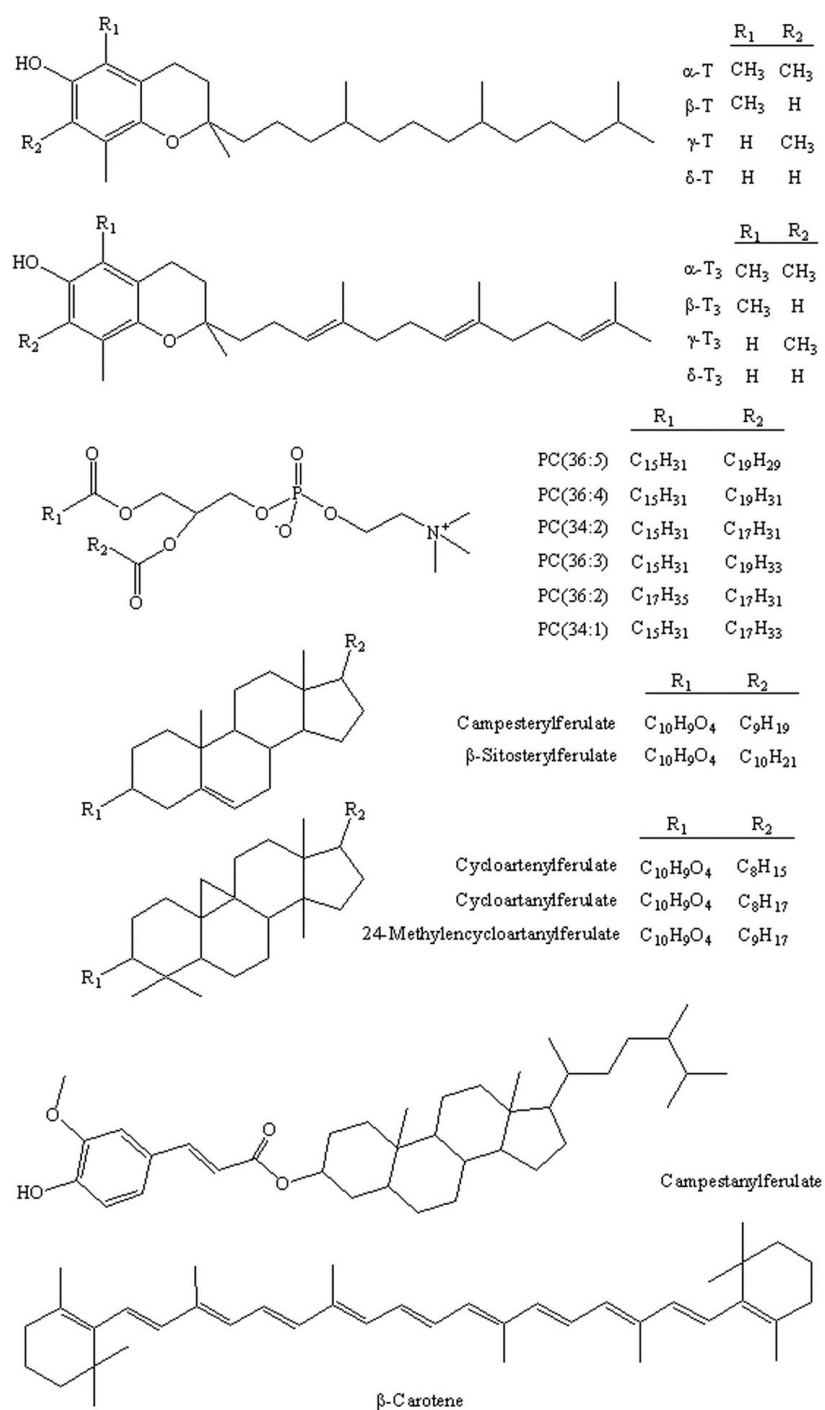

Figure A.1. The basic chemical structures of 21 nutrients in rice.

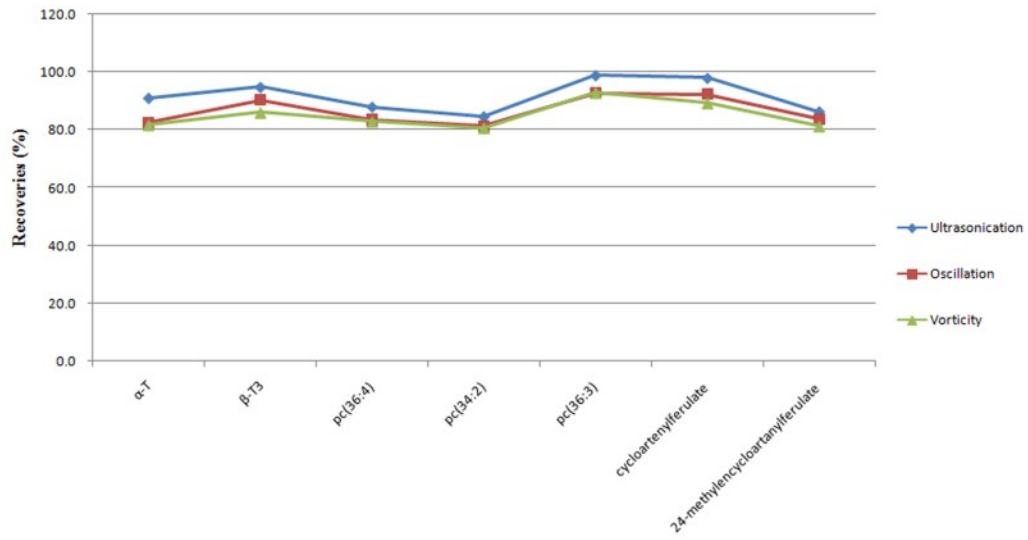

Figure A.2. Recoveries of nutritional compounds extracted by ultrasonication, oscillation and vorticity methods in white rice.

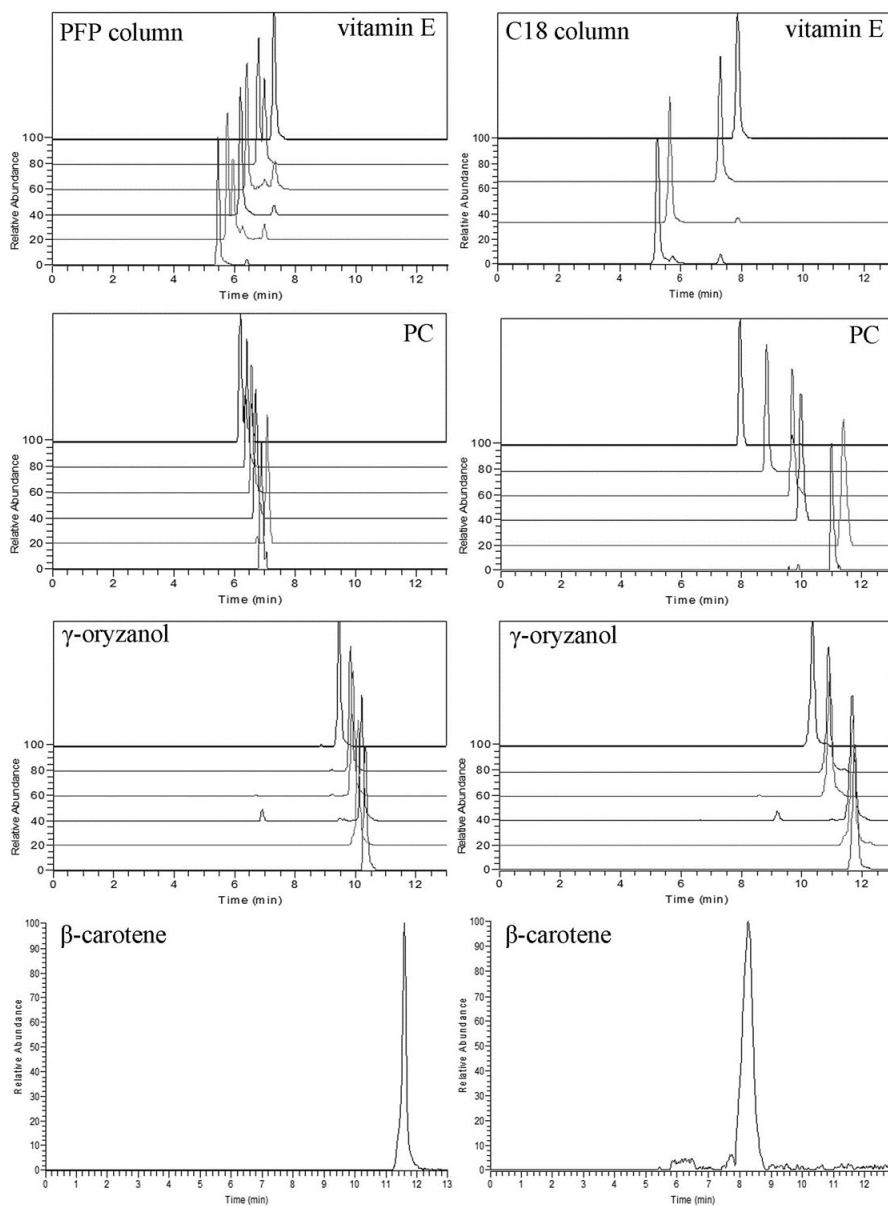

Figure A.3. The separation of chromatographic columns: PFP and C18 columns.

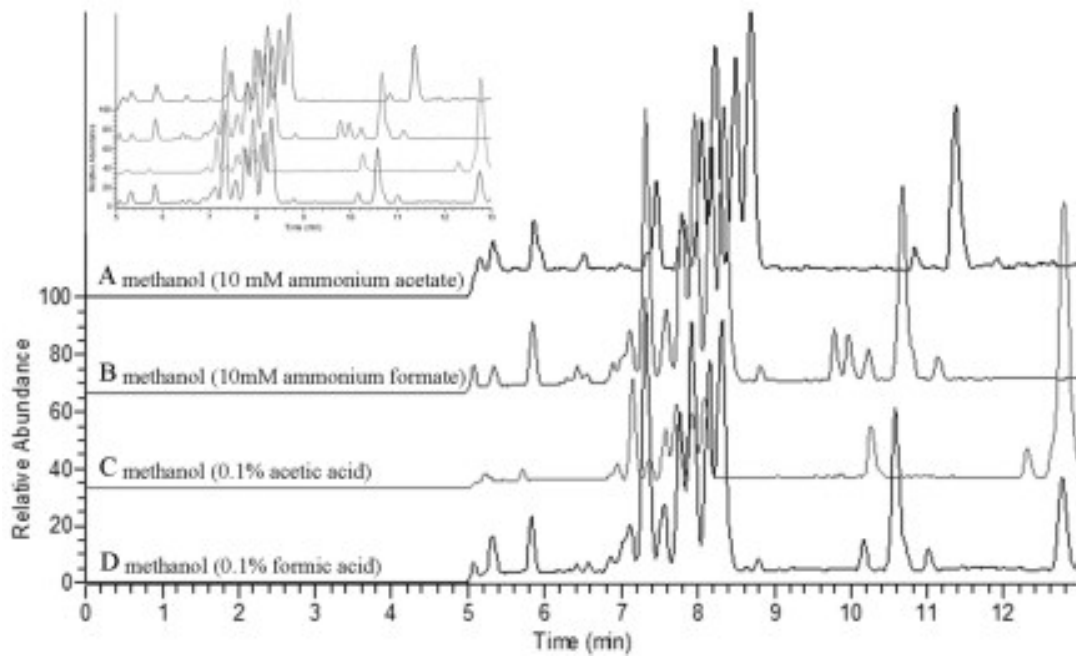

Figure A.4. The optimization of elution system (A: methanol-10 mM ammonium acetate, B: methanol-10mM ammonium formate, C: methanol-0.1% acetic acid, D: methanol-0.1% formic acid).

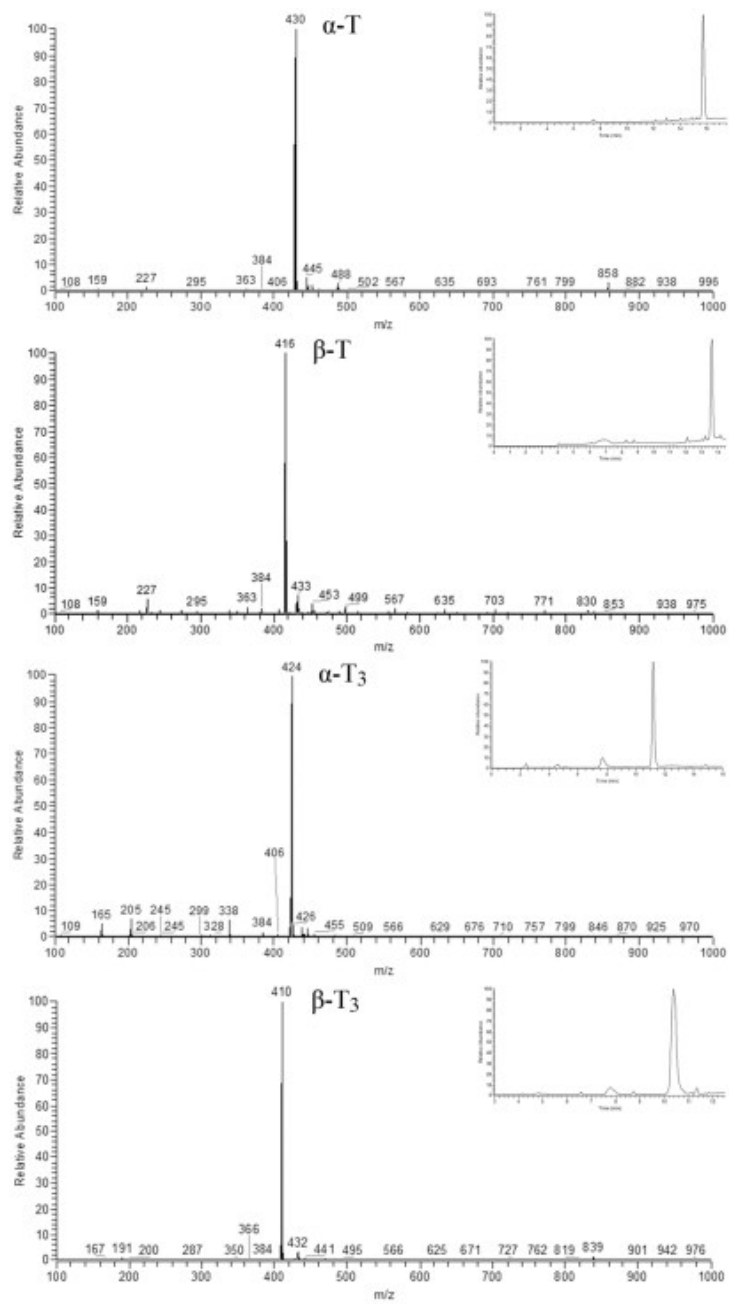

Figure A.5. The molecular peaks of vitamin E with non-ionization in the ESI source.

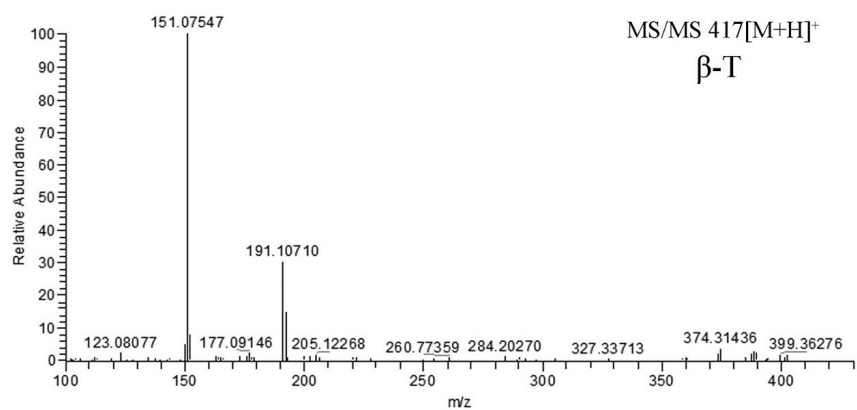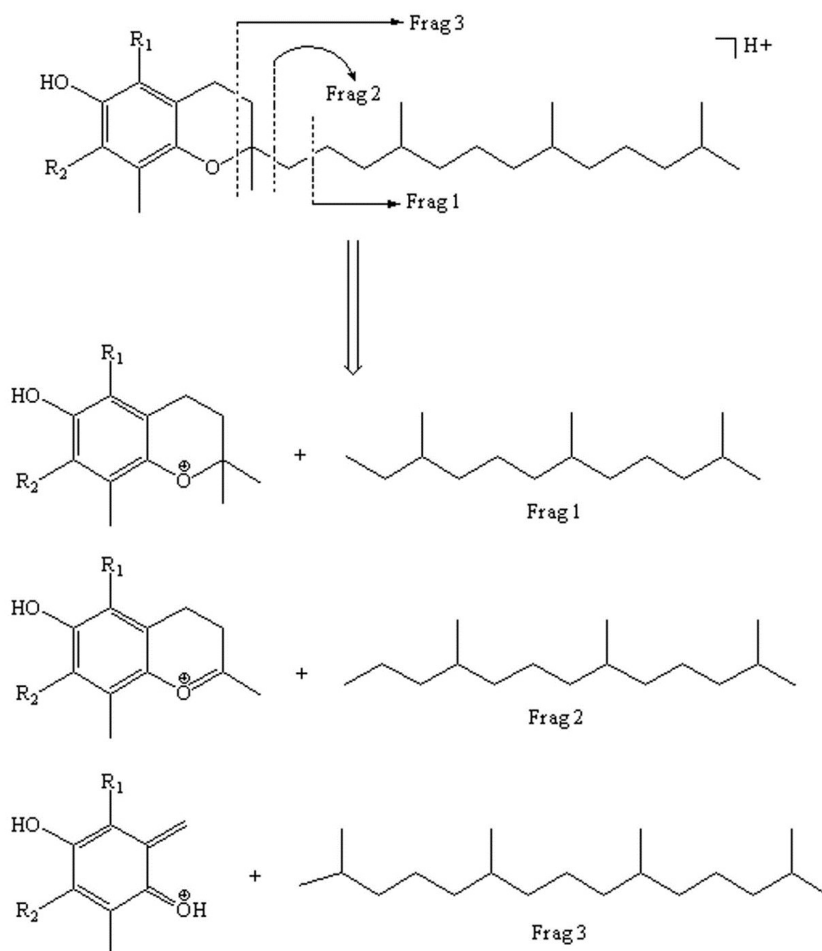

Figure A.6. The fragmentation patterns of tocopherols.

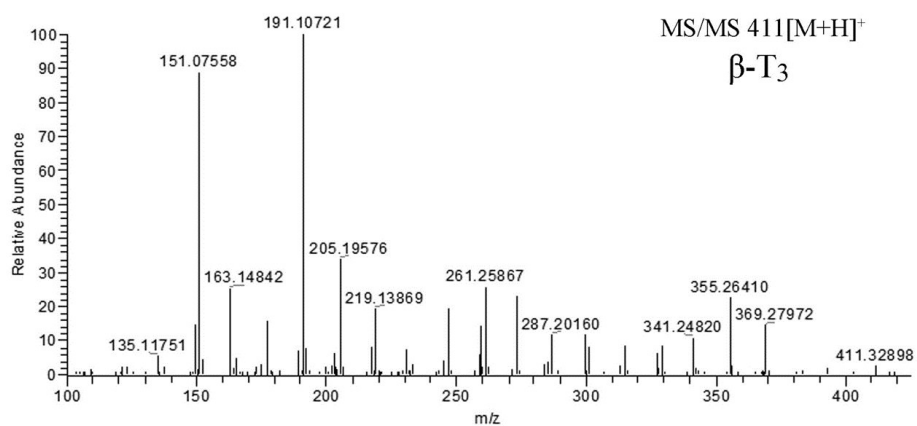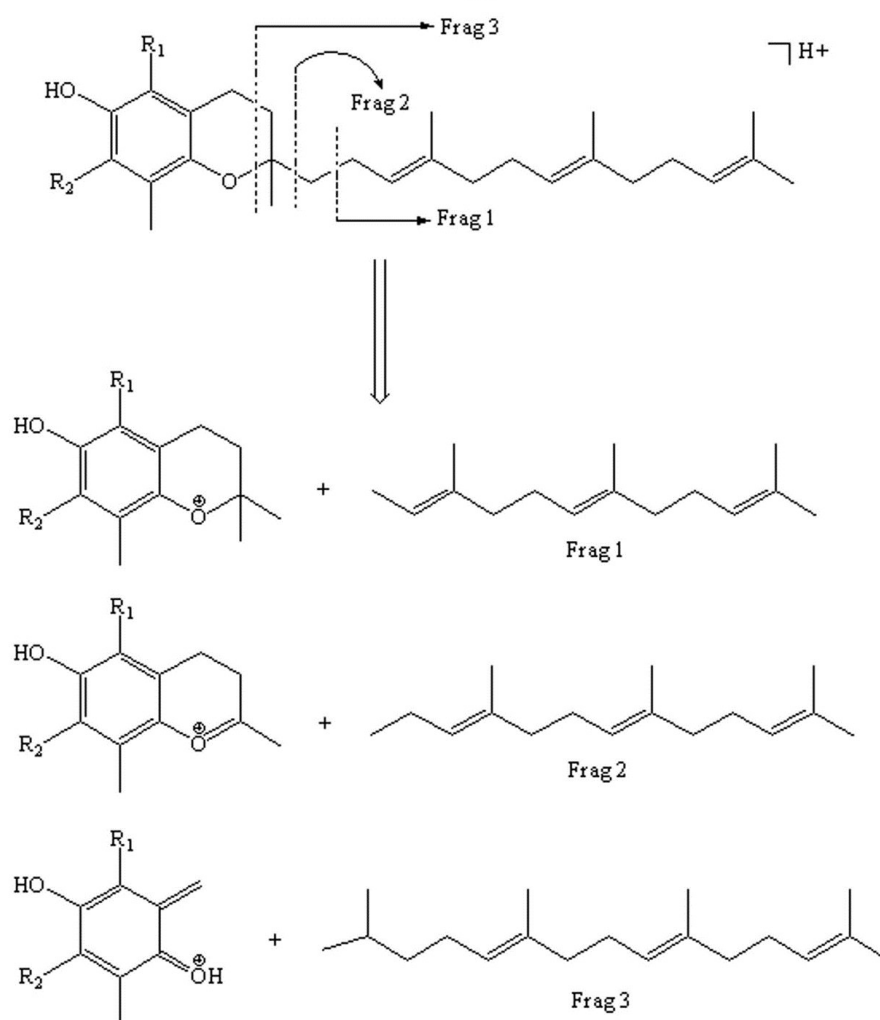

Figure A.7. The fragmentation patterns of tocotrienols.



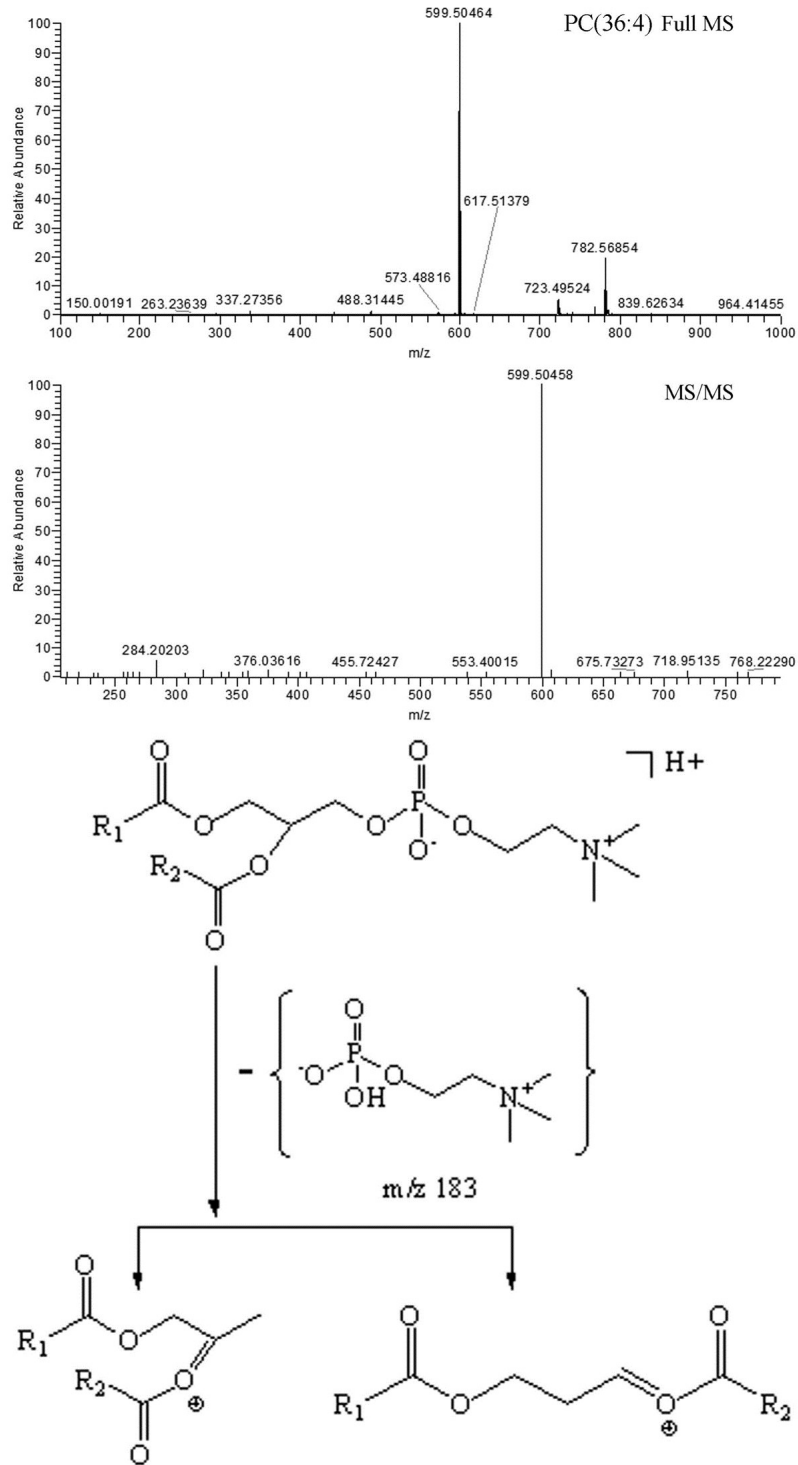

Figure A.8. The fragmentation patterns of phospholipids.

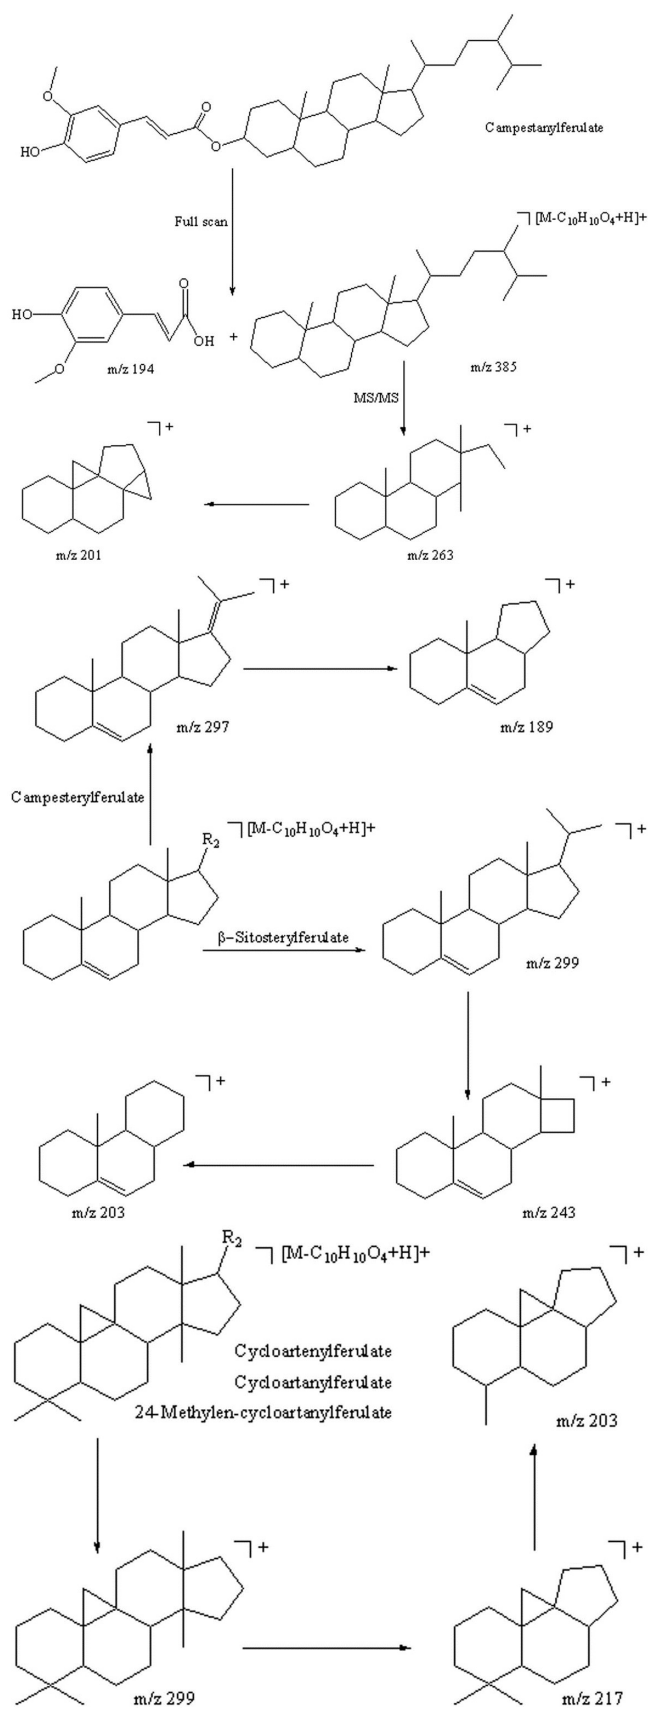

Figure A.9. The fragmentation patterns of  $\gamma$ -oryzanols.

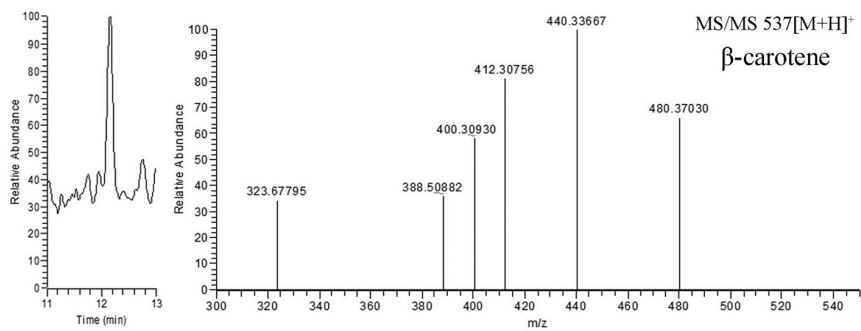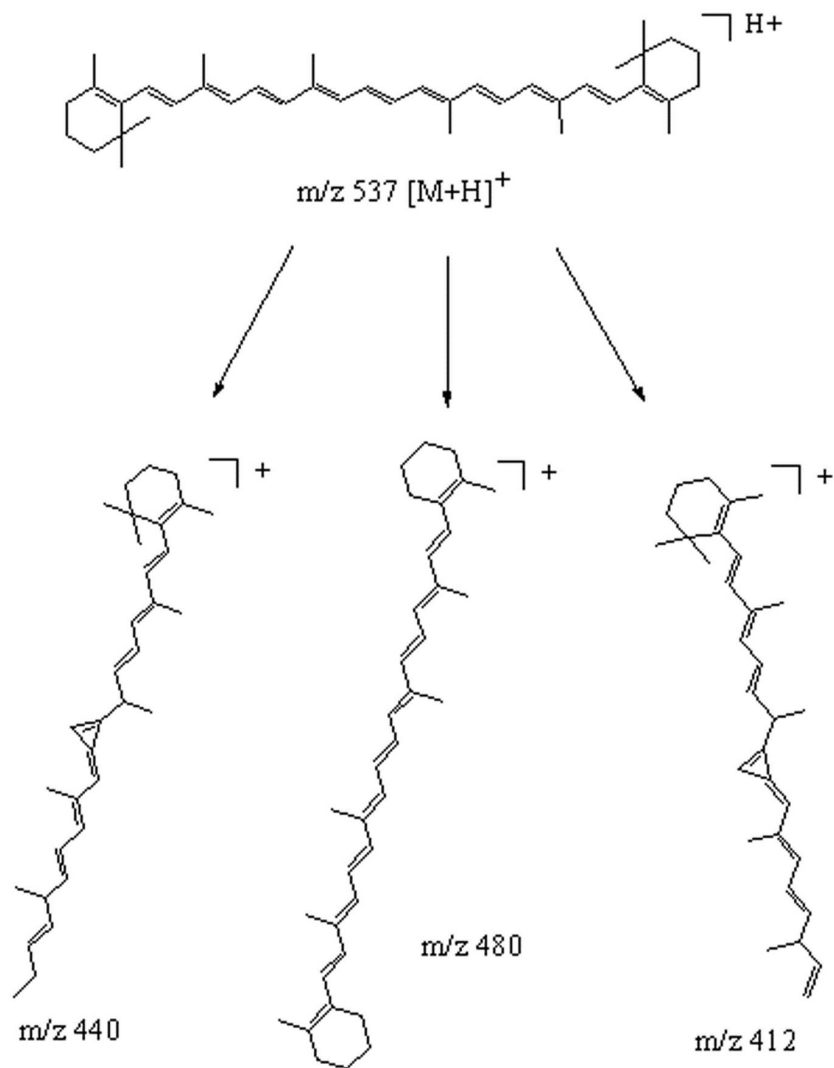

Figure A.10. The fragmentation patterns of β-carotene.

**Table A.1-A.3 as follows:**

**Table A.1** Identification of 21 components using UHPLC-LTQ-Orbitrap MS.

| NO. | Tr (min) | Ion mode                                                               | Measured mass (m/z) | Calculated mass (m/z) | Mass error (ppm) | Fragment ion information (MS/MS) | Molecular formula                                 | Compounds                                                     |
|-----|----------|------------------------------------------------------------------------|---------------------|-----------------------|------------------|----------------------------------|---------------------------------------------------|---------------------------------------------------------------|
| 1   | 7.54     | [M+H] <sup>+</sup>                                                     | 431.38901           | 431.38836             | 1.5              | MS: 205(98%),165(100%)           | C <sub>29</sub> H <sub>50</sub> O <sub>2</sub>    | α-T                                                           |
| 2   | 7.20     | [M+H] <sup>+</sup>                                                     | 417.37314           | 417.37271             | 1.0              | MS: 191(30%),151(100%)           | C <sub>28</sub> H <sub>48</sub> O <sub>2</sub>    | β-T                                                           |
| 3   | 6.99     | [M+H] <sup>+</sup>                                                     | 417.37268           | 417.37271             | -0.1             | MS: 191(26%),151(100%)           | C <sub>28</sub> H <sub>48</sub> O <sub>2</sub>    | r-T                                                           |
| 4   | 6.58     | [M+H] <sup>+</sup>                                                     | 403.35754           | 403.35706             | 1.2              | MS: 191(100%),177(64%),163(70%)  | C <sub>27</sub> H <sub>46</sub> O <sub>2</sub>    | δ-T                                                           |
| 5   | 6.37     | [M+H] <sup>+</sup>                                                     | 425.34219           | 425.34141             | 1.8              | MS: 199(100%),151(62%)           | C <sub>29</sub> H <sub>44</sub> O <sub>2</sub>    | α-T3                                                          |
| 6   | 6.12     | [M+H] <sup>+</sup>                                                     | 411.32599           | 411.32576             | 0.6              | MS: 205(34%),191(100%),151(89%)  | C <sub>28</sub> H <sub>42</sub> O <sub>2</sub>    | β-T3                                                          |
| 7   | 5.92     | [M+H] <sup>+</sup>                                                     | 411.32553           | 411.32576             | -0.6             | MS: 205(36%),191(100%),151(96%)  | C <sub>28</sub> H <sub>42</sub> O <sub>2</sub>    | r-T3                                                          |
| 8   | 5.6      | [M+H] <sup>+</sup>                                                     | 397.31000           | 397.31011             | -0.3             | MS: 201(100%),187(69%)           | C <sub>27</sub> H <sub>40</sub> O <sub>2</sub>    | δ-T3                                                          |
| 9   | 6.46     | [M+H] <sup>+</sup>                                                     | 780.55267           | 780.55378             | -1.4             | MS: 597(100%)                    | C <sub>44</sub> H <sub>78</sub> O <sub>8</sub> NP | PC(36:5)                                                      |
| 10  | 6.71     | [M+H] <sup>+</sup>                                                     | 782.56976           | 782.56943             | 0.4              | MS: 599(100%)                    | C <sub>44</sub> H <sub>80</sub> O <sub>8</sub> NP | PC(36:4)                                                      |
| 11  | 6.89     | [M+H] <sup>+</sup>                                                     | 758.56946           | 758.56943             | 0.0              | MS: 575(100%)                    | C <sub>42</sub> H <sub>80</sub> O <sub>8</sub> NP | PC(34:2)                                                      |
| 12  | 7.03     | [M+H] <sup>+</sup>                                                     | 784.58569           | 784.58508             | 0.8              | MS: 601(100%)                    | C <sub>44</sub> H <sub>82</sub> O <sub>8</sub> NP | PC(36:3)                                                      |
| 13  | 7.45     | [M+H] <sup>+</sup>                                                     | 786.60077           | 786.60073             | 0.1              | MS: 603(100%)                    | C <sub>44</sub> H <sub>84</sub> O <sub>8</sub> NP | PC(36:2)                                                      |
| 14  | 7.24     | [M+H] <sup>+</sup>                                                     | 760.58508           | 760.58508             | 0.0              | MS: 577(100%)                    | C <sub>42</sub> H <sub>82</sub> O <sub>8</sub> NP | PC(34:1)                                                      |
| 15  | 9.85     | [M-<br>C <sub>10</sub> H <sub>10</sub> O <sub>4</sub> +H] <sup>+</sup> | 409.38351           | 409.38288             | 1.5              | MS: 299(57%),217(100%),203(57%)  | C <sub>40</sub> H <sub>48</sub> O <sub>4</sub>    | cycloartenyl<br>ferulate<br>24-<br>methylency<br>cloartanylfe |
| 16  | 10.25    | [M-<br>C <sub>10</sub> H <sub>10</sub> O <sub>4</sub> +H] <sup>+</sup> | 423.39978           | 423.39853             | 3.0              | MS: 299(100%),217(83%)           | C <sub>41</sub> H <sub>60</sub> O <sub>4</sub>    | ulate<br>campesteryl                                          |
| 17  | 10.35    | [M-<br>C <sub>10</sub> H <sub>10</sub> O <sub>4</sub> +H] <sup>+</sup> | 383.36765           | 383.36723             | 1.1              | MS: 297(59%),189(100%)           | C <sub>38</sub> H <sub>56</sub> O <sub>4</sub>    | ferulate<br>β-<br>sitosterylfer                               |
| 18  | 10.66    | [M-<br>C <sub>10</sub> H <sub>10</sub> O <sub>4</sub> +H] <sup>+</sup> | 397.38303           | 397.38288             | 0.4              | MS: 299(35%),243(100%),203(52%)  | C <sub>39</sub> H <sub>58</sub> O <sub>4</sub>    | ulate<br>cycloartanyl                                         |
| 19  | 10.51    | [M-<br>C <sub>10</sub> H <sub>10</sub> O <sub>4</sub> +H] <sup>+</sup> | 411.39905           | 411.39853             | 1.3              | MS: 299(68%),217(100%),203(96%)  | C <sub>40</sub> H <sub>60</sub> O <sub>4</sub>    | ferulate<br>campestanlyl                                      |
| 20  | 10.79    | [M-<br>C <sub>10</sub> H <sub>10</sub> O <sub>4</sub> +H] <sup>+</sup> | 385.38300           | 385.38288             | 0.3              | MS: 263(69%),201(100%)           | C <sub>38</sub> H <sub>58</sub> O <sub>4</sub>    | ferulate                                                      |
| 21  | 12.12    | [M+H] <sup>+</sup>                                                     | 537.44653           | 537.44548             | 2.0              | MS: 480(65%),440(100%),412(80%)  | C <sub>40</sub> H <sub>56</sub>                   | β-carotene                                                    |

**Table A.2** Recoveries yielded

| Compounds                       | R% (n=3)   |              |             |            |              |             |
|---------------------------------|------------|--------------|-------------|------------|--------------|-------------|
|                                 | White rice |              |             | Brown rice |              |             |
|                                 | High level | Medium level | Lower level | High level | Medium level | Lower level |
| $\alpha$ -T                     | 90.7       | 91.0         | 90.7        | 99.2       | 91.1         | 99.4        |
| $\beta$ -T                      | 94.9       | 97.7         | 81.4        | 91.9       | 97.9         | 96.4        |
| $\gamma$ -T                     | 92.0       | 98.8         | 89.7        | 94.8       | 98.8         | 92.2        |
| $\delta$ -T                     | 92.1       | 97.1         | 99.4        | 87.7       | 98.2         | 97.2        |
| $\alpha$ -T3                    | 82.5       | 95.7         | 83.7        | 84.9       | 95.8         | 94.1        |
| $\beta$ -T3                     | 97.6       | 94.9         | 98.4        | 93.4       | 96.9         | 89.8        |
| $\gamma$ -T3                    | 82.8       | 90.8         | 97.7        | 84.8       | 94.1         | 94.5        |
| $\delta$ -T3                    | 88.8       | 91.4         | 92.0        | 86.1       | 92.4         | 93.2        |
| PC(36:5)                        | 86.6       | 83.3         | 99.9        | 95.8       | 96.8         | 98.8        |
| PC(36:4)                        | 98.2       | 87.6         | 96.1        | 96.1       | 90.9         | 84.9        |
| PC(34:2)                        | 80.6       | 83.7         | 94.7        | 84.3       | 84.5         | 97.8        |
| PC(36:3)                        | 92.9       | 98.7         | 87.1        | 96.7       | 98.7         | 90.0        |
| PC(36:2)                        | 90.0       | 96.1         | 91.7        | 85.6       | 83.6         | 99.1        |
| PC(34:1)                        | 109.6      | 104          | 105.3       | 106.7      | 103          | 101.9       |
| cycloartenylferulate            | 94.6       | 97.7         | 99.5        | 93.7       | 93.1         | 95.0        |
| 24-methylencycloartanylferulate | 97.0       | 85.9         | 85.9        | 97.1       | 87.6         | 95.8        |
| campesterylferulate             | 95.2       | 98.1         | 93.5        | 87.4       | 89.2         | 98.3        |
| $\beta$ -sitosterylferulate     | 90.9       | 86.5         | 94.3        | 92.5       | 97.7         | 96.2        |
| cycloartanylferulate            | 90.3       | 97.7         | 93.7        | 91.5       | 94.8         | 92.2        |
| campestanylferulate             | 93.2       | 87.6         | 86.2        | 95.4       | 90.4         | 97.5        |
| $\beta$ -carotene               | 86.3       | 97.3         | 83.2        | 99.0       | 81.1         | 83.5        |

**Table A.3** Classification results of the discriminant analysis.

|          |       | Single  | Predicted Group Membership |       |       |       |       |       |
|----------|-------|---------|----------------------------|-------|-------|-------|-------|-------|
|          |       | Linkage | 1                          | 2     | 3     | 4     | 5     | Total |
| Original | Count | 1       | 6                          | 0     | 0     | 0     | 0     | 6     |
|          |       | 2       | 0                          | 6     | 0     | 0     | 0     | 6     |
|          |       | 3       | 0                          | 0     | 6     | 0     | 0     | 6     |
|          |       | 4       | 0                          | 0     | 0     | 6     | 0     | 6     |
|          |       | 5       | 0                          | 0     | 0     | 0     | 6     | 6     |
|          | (%a)  | 1       | 100.0                      | .0    | .0    | .0    | .0    | 100.0 |
|          |       | 2       | .0                         | 100.0 | .0    | .0    | .0    | 100.0 |
|          |       | 3       | .0                         | .0    | 100.0 | .0    | .0    | 100.0 |
|          |       | 4       | .0                         | .0    | .0    | 100.0 | .0    | 100.0 |
|          |       | 5       | .0                         | .0    | .0    | .0    | 100.0 | 100.0 |

<sup>a</sup> 100.0% of original grouped cases correctly classified.
